# Supplementary material
Source: publisher site journal article supplement (https://www.spandidos-publications.com/698/downloadSupplementary)

Figure S1. Immunohistochemical staining of CD44 and CD24 (magnification, x100). CD44 and CD24 staining from a patient with (A) CD44<sup>+</sup>/CD24<sup>+</sup>; (B) CD44<sup>+</sup>/CD24<sup>-</sup>; (C) CD44<sup>-</sup>/CD24<sup>+</sup>; and (D) CD44<sup>-</sup>/CD24<sup>-</sup>.

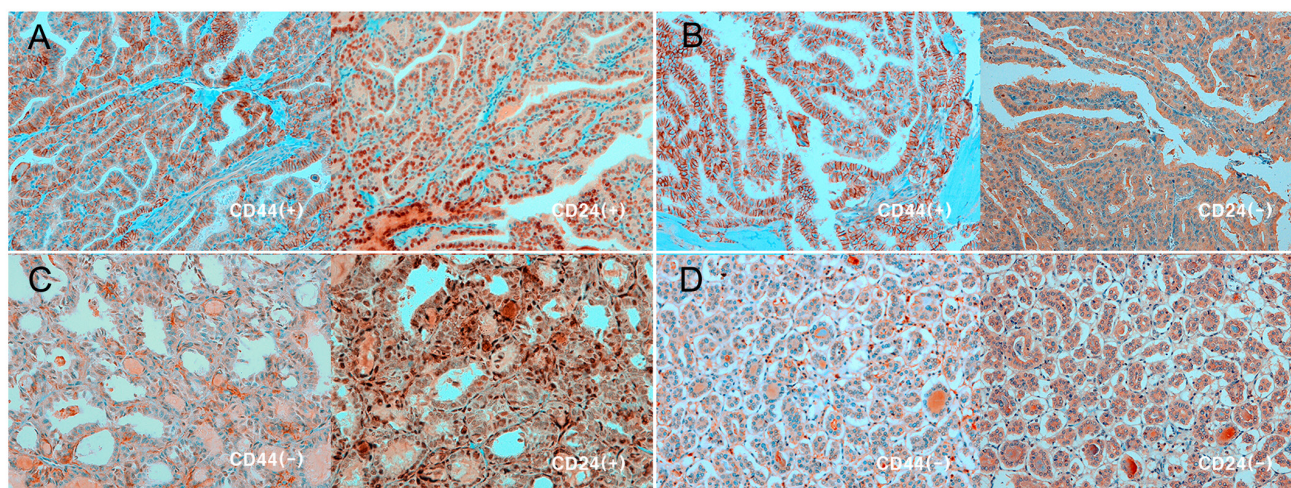

Supplement: Supplementary file 1 [file downloadSupplementary]
